# Supplementary material for: Results and lessons learnt from a randomized controlled trial: prophylactic treatment of vestibular migraine with metoprolol (PROVEMIG)
Source: Springer Nature journal article supplement (doi:10.1186/s13063-019-3903-5), 2019-12-01
Supplement: MOESM3 [file 17661848]

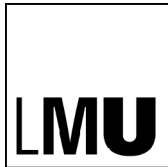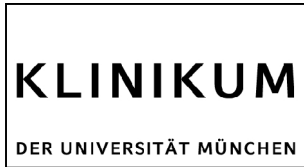

CAMPUS GROSSHADERN  
 GERMAN CENTER FOR VERTIGO  
 AND BALANCE DISORDERS

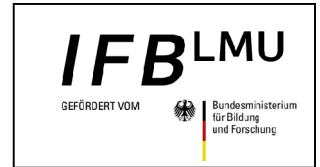

# Dizziness diary

PROVEMIG-Trial

Patient-ID: \_\_\_\_\_

Month/Year: \_\_\_\_/\_\_\_\_

| Date | Time of day | Duration of the Attack in hours, minutes | Type and severity of vertigo<br>S postural vertigo (like on a ship)<br>D rotatory vertigo (like in a carousel)<br>G gait ataxia<br>B lightheadedness<br>×mild, ××moderate, ×××severe | Accompanying symptoms, e. g.<br>A headache<br>B nausea<br>C vomiting<br>D photo- or phonophobia<br>E diplopia<br>F other visual symptoms<br>G tendency to fall<br>H other: _____ | Remarks<br>action taken<br>medication |
|------|-------------|------------------------------------------|--------------------------------------------------------------------------------------------------------------------------------------------------------------------------------------|----------------------------------------------------------------------------------------------------------------------------------------------------------------------------------|---------------------------------------|
| 1    |             |                                          |                                                                                                                                                                                      |                                                                                                                                                                                  |                                       |
| 2    |             |                                          |                                                                                                                                                                                      |                                                                                                                                                                                  |                                       |
| 3    |             |                                          |                                                                                                                                                                                      |                                                                                                                                                                                  |                                       |
| 4    |             |                                          |                                                                                                                                                                                      |                                                                                                                                                                                  |                                       |
| 5    |             |                                          |                                                                                                                                                                                      |                                                                                                                                                                                  |                                       |
| 6    |             |                                          |                                                                                                                                                                                      |                                                                                                                                                                                  |                                       |
| 7    |             |                                          |                                                                                                                                                                                      |                                                                                                                                                                                  |                                       |
| 8    |             |                                          |                                                                                                                                                                                      |                                                                                                                                                                                  |                                       |
| 9    |             |                                          |                                                                                                                                                                                      |                                                                                                                                                                                  |                                       |
| 10   |             |                                          |                                                                                                                                                                                      |                                                                                                                                                                                  |                                       |
| 11   |             |                                          |                                                                                                                                                                                      |                                                                                                                                                                                  |                                       |
| 12   |             |                                          |                                                                                                                                                                                      |                                                                                                                                                                                  |                                       |
| 13   |             |                                          |                                                                                                                                                                                      |                                                                                                                                                                                  |                                       |
| 14   |             |                                          |                                                                                                                                                                                      |                                                                                                                                                                                  |                                       |
| 15   |             |                                          |                                                                                                                                                                                      |                                                                                                                                                                                  |                                       |
| 16   |             |                                          |                                                                                                                                                                                      |                                                                                                                                                                                  |                                       |
| 17   |             |                                          |                                                                                                                                                                                      |                                                                                                                                                                                  |                                       |
| 18   |             |                                          |                                                                                                                                                                                      |                                                                                                                                                                                  |                                       |
| 19   |             |                                          |                                                                                                                                                                                      |                                                                                                                                                                                  |                                       |
| 20   |             |                                          |                                                                                                                                                                                      |                                                                                                                                                                                  |                                       |
| 21   |             |                                          |                                                                                                                                                                                      |                                                                                                                                                                                  |                                       |
| 22   |             |                                          |                                                                                                                                                                                      |                                                                                                                                                                                  |                                       |
| 23   |             |                                          |                                                                                                                                                                                      |                                                                                                                                                                                  |                                       |
| 24   |             |                                          |                                                                                                                                                                                      |                                                                                                                                                                                  |                                       |
| 25   |             |                                          |                                                                                                                                                                                      |                                                                                                                                                                                  |                                       |
| 26   |             |                                          |                                                                                                                                                                                      |                                                                                                                                                                                  |                                       |
| 27   |             |                                          |                                                                                                                                                                                      |                                                                                                                                                                                  |                                       |
| 28   |             |                                          |                                                                                                                                                                                      |                                                                                                                                                                                  |                                       |
| 29   |             |                                          |                                                                                                                                                                                      |                                                                                                                                                                                  |                                       |
| 30   |             |                                          |                                                                                                                                                                                      |                                                                                                                                                                                  |                                       |
| 31   |             |                                          |                                                                                                                                                                                      |                                                                                                                                                                                  |                                       |

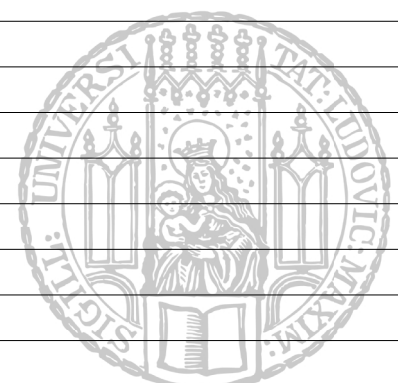

# Instructions for using the dizziness diary

## General

The dizziness diary is critical to assessing your treatment success. Every time you visit the study center, the investigator will go over it with you to interpret its content correctly. Please also have it ready for the phone interviews. At the time of issue, the investigator will enter your patient identification number at the top, which has been assigned to you for the PROVEMIG study, and which you will also find on your study medication. Please also make sure that month and year (e.g. Jan - 2012) are not missing.

## Structure

For each calendar month a diary sheet is kept. In the left column you will find the date (day). If an attack occurs, enter the time, duration, nature and accompanying complaints in this line in the boxes provided. To save space, abbreviations for dizziness and concomitant symptoms are already given in the header. If your attacks are regularly accompanied by symptoms that are not listed there, you can assign more abbreviations (see H others: \_\_\_\_\_). Specify the severity behind the type of dizziness using x to xxx (mild to severe).

Undocumented periods (e.g. because they have been missed or not covered by the diary sheet) have to be crossed out.

The following example shows entries of a patient who

- came on the 3<sup>rd</sup> for a visit. The days before that are cancelled, as they were before the beginning of study, or were covered by a diary sheet, which was already delivered at the last visit.
- was symptom-free on the 3<sup>rd</sup> (day of the visit).
- suffered a 30-minute rotatory vertigo, headache and nausea on the 4<sup>th</sup>, and took Ibuprofen.
- was mildly lightheaded on the 5<sup>th</sup> since awakening at 8 a.m. to noon.

The duration refers to the duration of the dizziness given in the 4th column. If the duration of concomitant symptoms deviates significantly, please note this in the right column (e.g. headache 4 h).

| <b>D<br/>a<br/>t<br/>e</b> | <b>Time<br/>of<br/>day</b> | <b>Duration<br/>of the<br/>Attack<br/>in<br/>hours,<br/>minutes</b> | <b>Type and severity of<br/>vertigo</b><br>S postural vertigo (like on a<br>ship)<br>D rotatory vertigo (like in a<br>carousel)<br>G gait ataxia<br>B lightheadedness<br>x mild, xx moderate, xxx severe | <b>Accompanying symptoms, e. g.</b><br>A headache<br>B nausea<br>C vomiting<br>D photo- or phonophobia<br>E diplopia<br>F other visual symptoms<br>G tendency to fall<br>H other: _____ | <b>Remarks<br/>action taken<br/>medication</b> |
|----------------------------|----------------------------|---------------------------------------------------------------------|----------------------------------------------------------------------------------------------------------------------------------------------------------------------------------------------------------|-----------------------------------------------------------------------------------------------------------------------------------------------------------------------------------------|------------------------------------------------|
| 1                          |                            |                                                                     |                                                                                                                                                                                                          |                                                                                                                                                                                         |                                                |
| 2                          |                            |                                                                     |                                                                                                                                                                                                          |                                                                                                                                                                                         |                                                |
| 3                          |                            |                                                                     |                                                                                                                                                                                                          |                                                                                                                                                                                         |                                                |
| 4                          | 16:30                      | 30 min                                                              | D xx                                                                                                                                                                                                     |                                                                                                                                                                                         | A, B, Ibuprofen 400 mg eingenommen             |
| 5                          | 08:00                      | 4 h                                                                 | B x                                                                                                                                                                                                      |                                                                                                                                                                                         |                                                |
| ...                        |                            |                                                                     |                                                                                                                                                                                                          |                                                                                                                                                                                         |                                                |
| 31                         |                            |                                                                     |                                                                                                                                                                                                          |                                                                                                                                                                                         |                                                |

If you have any questions, please contact your investigator.

English translation of Version 1.0 from 18.01.2012.

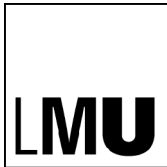

**KLINIKUM**  
DER UNIVERSITÄT MÜNCHEN

INTEGRIERTES FORSCHUNGS- UND  
BEHANDLUNGSZENTRUM FÜR  
SCHWINDEL, GLEICHGEWICHTS- UND  
AUGENBEWEGUNGSSTÖRUNGEN

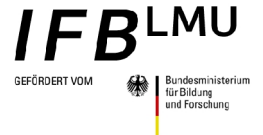

## Schwindeltagebuch

PROVEMIG-Studie

Patienten-ID: \_\_\_\_\_

Monat/Jahr: \_\_\_\_/\_\_\_\_

| <b>D<br/>a<br/>t<br/>u<br/>m</b> | <b>Uhrzeit</b> | <b>Dauer<br/>der<br/>Attacke<br/>in<br/>Stunden,<br/>Minuten</b> | <b>Art und Stärke des<br/>Schwindels</b><br>S Schwankschwindel (wie auf<br>einem Schiff)<br>D Drehschwindel (wie in einem<br>Karussell)<br>G Gangunsicherheit<br>B Benommenheitsgefühl<br>x leicht, xx mittel, xxx stark | <b>Begleitende Beschwerden, z. B.</b><br>A Kopfschmerz<br>B Übelkeit<br>C Erbrechen<br>D Licht- oder Lärmempfindlichkeit<br>E Doppelbilder<br>F andere Sehstörungen<br>G Sturzneigung<br>H andere: _____ | <b>Bemerkungen</b><br>Maßnahmen,<br>Medikamente |
|----------------------------------|----------------|------------------------------------------------------------------|--------------------------------------------------------------------------------------------------------------------------------------------------------------------------------------------------------------------------|----------------------------------------------------------------------------------------------------------------------------------------------------------------------------------------------------------|-------------------------------------------------|
| 1                                |                |                                                                  |                                                                                                                                                                                                                          |                                                                                                                                                                                                          |                                                 |
| 2                                |                |                                                                  |                                                                                                                                                                                                                          |                                                                                                                                                                                                          |                                                 |
| 3                                |                |                                                                  |                                                                                                                                                                                                                          |                                                                                                                                                                                                          |                                                 |
| 4                                |                |                                                                  |                                                                                                                                                                                                                          |                                                                                                                                                                                                          |                                                 |
| 5                                |                |                                                                  |                                                                                                                                                                                                                          |                                                                                                                                                                                                          |                                                 |
| 6                                |                |                                                                  |                                                                                                                                                                                                                          |                                                                                                                                                                                                          |                                                 |
| 7                                |                |                                                                  |                                                                                                                                                                                                                          |                                                                                                                                                                                                          |                                                 |
| 8                                |                |                                                                  |                                                                                                                                                                                                                          |                                                                                                                                                                                                          |                                                 |
| 9                                |                |                                                                  |                                                                                                                                                                                                                          |                                                                                                                                                                                                          |                                                 |
| 10                               |                |                                                                  |                                                                                                                                                                                                                          |                                                                                                                                                                                                          |                                                 |
| 11                               |                |                                                                  |                                                                                                                                                                                                                          |                                                                                                                                                                                                          |                                                 |
| 12                               |                |                                                                  |                                                                                                                                                                                                                          |                                                                                                                                                                                                          |                                                 |
| 13                               |                |                                                                  |                                                                                                                                                                                                                          |                                                                                                                                                                                                          |                                                 |
| 14                               |                |                                                                  |                                                                                                                                                                                                                          |                                                                                                                                                                                                          |                                                 |
| 15                               |                |                                                                  |                                                                                                                                                                                                                          |                                                                                                                                                                                                          |                                                 |
| 16                               |                |                                                                  |                                                                                                                                                                                                                          |                                                                                                                                                                                                          |                                                 |
| 17                               |                |                                                                  |                                                                                                                                                                                                                          |                                                                                                                                                                                                          |                                                 |
| 18                               |                |                                                                  |                                                                                                                                                                                                                          |                                                                                                                                                                                                          |                                                 |
| 19                               |                |                                                                  |                                                                                                                                                                                                                          |                                                                                                                                                                                                          |                                                 |
| 20                               |                |                                                                  |                                                                                                                                                                                                                          |                                                                                                                                                                                                          |                                                 |
| 21                               |                |                                                                  |                                                                                                                                                                                                                          |                                                                                                                                                                                                          |                                                 |
| 22                               |                |                                                                  |                                                                                                                                                                                                                          |                                                                                                                                                                                                          |                                                 |
| 23                               |                |                                                                  |                                                                                                                                                                                                                          |                                                                                                                                                                                                          |                                                 |
| 24                               |                |                                                                  |                                                                                                                                                                                                                          |                                                                                                                                                                                                          |                                                 |
| 25                               |                |                                                                  |                                                                                                                                                                                                                          |                                                                                                                                                                                                          |                                                 |
| 26                               |                |                                                                  |                                                                                                                                                                                                                          |                                                                                                                                                                                                          |                                                 |
| 27                               |                |                                                                  |                                                                                                                                                                                                                          |                                                                                                                                                                                                          |                                                 |
| 28                               |                |                                                                  |                                                                                                                                                                                                                          |                                                                                                                                                                                                          |                                                 |
| 29                               |                |                                                                  |                                                                                                                                                                                                                          |                                                                                                                                                                                                          |                                                 |
| 30                               |                |                                                                  |                                                                                                                                                                                                                          |                                                                                                                                                                                                          |                                                 |
| 31                               |                |                                                                  |                                                                                                                                                                                                                          |                                                                                                                                                                                                          |                                                 |

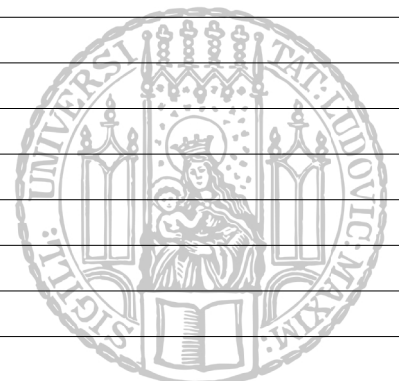

# Hinweise zum Schwindeltagebuch

## Allgemeines

Das Schwindeltagebuch ist zur Beurteilung Ihres Behandlungserfolgs von entscheidender Bedeutung. Bei jedem Besuch im Studienzentrum wird der Prüfarzt es mit Ihnen durchgehen, um den Inhalt richtig interpretieren zu können. Bitte halten Sie es auch für die Telefoninterviews bereit. Bei Ausgabe trägt der Prüfarzt oben Ihre Patienten-Identifikationsnummer ein, die Ihnen für die PROVEMIG-Studie zugewiesen wurde und die Sie auch auf Ihrer Studienmedikation wiederfinden. Bitte achten Sie auch darauf, daß Monat und Jahr (z. B. Jan – 2012) nicht fehlen.

## Aufbau

Für jeden Kalendermonat wird ein Tagebuchblatt geführt. In der linken Spalte finden Sie das Datum (Tag). Wenn eine Attacke auftritt, tragen Sie Uhrzeit, Dauer, Art und begleitende Beschwerden in dieser Zeile in die vorgesehenen Kästchen ein. Um Platz zu sparen, sind in der Kopfzeile bereits Abkürzungen für Schwindelarten und Begleitsymptome vorgegeben. Falls mit Ihren Attacken regelmäßig nicht dort gelistete Begleitsymptome auftreten, können Sie weitere Abkürzungen vergeben (siehe H andere: \_\_\_\_\_). Die Schwere geben Sie hinter der Schwindelart mit x bis xxx (leicht bis stark) an.

Zeiträume, die nicht dokumentiert wurden (z. B. weil sie versäumt wurden oder die durch das Tagebuchblatt nicht abgedeckt wurden), sind zu streichen.

Das folgende Beispiel zeigt Einträge eines Patienten, der

- am 3. zur Visite kam. Die Tage davor sind gestrichen, da sie vor Studienbeginn lagen, oder von einem Tagebuchblatt abgedeckt wurden, das bei der letzten Visite schon abgegeben wurde.
- am 3. (Tag der Visite) beschwerdefrei war
- am 4. eine 30minütige Drehschwindelattacke, Kopfschmerzen und Übelkeit erlitten und Ibuprofen eingenommen hat
- am 5. seit dem Aufwachen um 8 Uhr bis mittags leicht benommen war

Die Dauer bezieht sich auf die Dauer des in der 4. Spalte angegebenen Schwindels. Sollte die Dauer von Begleitsymptomen davon deutlich abweichen, notieren Sie dies bitte in der rechten Spalte (z. B. Kopfschmerz 4 h).

| Datum | Uhrzeit | Dauer der Attacke in Stunden, Minuten | Art und Stärke des Schwindels<br>S Schwankschwindel (wie auf einem Schiff)<br>D Drehschwindel (wie in einem Karusell)<br>G Gangunsicherheit<br>B Benommenheitsgefühl<br>x leicht, xx mittel, xxx stark | Begleitende Beschwerden, z. B.                                                                                                                                  | Bemerkungen<br>Maßnahmen,<br>Medikamente |
|-------|---------|---------------------------------------|--------------------------------------------------------------------------------------------------------------------------------------------------------------------------------------------------------|-----------------------------------------------------------------------------------------------------------------------------------------------------------------|------------------------------------------|
|       |         |                                       |                                                                                                                                                                                                        | A Kopfschmerz<br>B Übelkeit<br>C Erbrechen<br>D Licht- oder Lärmempfindlichkeit<br>E Doppelbilder<br>F andere Sehstörungen<br>G Sturzneigung<br>H andere: _____ |                                          |
| 1     |         |                                       |                                                                                                                                                                                                        |                                                                                                                                                                 |                                          |
| 2     |         |                                       |                                                                                                                                                                                                        |                                                                                                                                                                 |                                          |
| 3     |         |                                       |                                                                                                                                                                                                        |                                                                                                                                                                 |                                          |
| 4     | 16:30   | 30 min                                | D xx                                                                                                                                                                                                   |                                                                                                                                                                 | A, B, Ibuprofen 400 mg eingenommen       |
| 5     | 08:00   | 4 h                                   | B x                                                                                                                                                                                                    |                                                                                                                                                                 |                                          |
| ...   |         |                                       |                                                                                                                                                                                                        |                                                                                                                                                                 |                                          |
| 31    |         |                                       |                                                                                                                                                                                                        |                                                                                                                                                                 |                                          |

Bei Unklarheiten wenden Sie sich bitte an Ihren Prüfarzt.
